# Supplementary material for: Rajyoga Meditation Experience Induces Enhanced Positive Thoughts and Alters Gray Matter Volume of Brain Regions: A Cross-sectional Study
Source: Springer Nature journal article supplement (doi:10.1007/s12671-021-01630-8), 2021-05-08
Supplement: MOESM1 [file 19144488]

**Supplementary Details and Table**

**Table S1** Comparison of regional GMV that extracted from using AAL atlas between NM and RM groups and selection of coordinates based on the previous studies.

| Regions Extracted from AAL Atlas | | | Side | | *p* | Previous studies | Coordinates  (mask size)# |
| --- | --- | --- | --- | --- | --- | --- | --- |
| Superior frontal gyrus | | | R | 0.075 | | (Bærentsen et al., 2010; Grant et al., 2013; Kang et al., 2013) | ±16 64 6  (8 mm) |
| Orbito frontal cortex | **Superior** | | R | 0.048* | | (Froeliger et al., 2012; Hernández et al., 2016; Hölzel et al., 2008; Kang et al., 2013; Luders et al., 2009) | ±28 42 -4  (16 mm) |
| **Middle** | | R | 0.031* | |
| **Inferior** | | L | 0.085 | |
| Rectus | | | L | 0.039* | | (Froeliger et al., 2012) | ±9 21 -23  (8 mm) |
| R | 0.046* | |
| Cingulate gyrus | | **Anterior** | L | 0.041** | | (Grant et al., 2010; Hernández et al., 2018) | ±6 51 10  (8 mm) |
|  | **Posterior** | | L | 0.074 | | (Hölzel et al., 2011; Panda et al., 2016) | ±4 -34 32  (8 mm) |
| Parietal gyrus | **Superior** | | L | 0.048* | | (Bærentsen et al., 2010; Grant et al., 2013; Korponay et al., 2019) | ±27 -60 67  (8 mm) |
| **Inferior** | | L | 0.008* | | ±48 -40 40  (8 mm) |
| Supramarginal gyrus | | | L | 0.053 | | ±60 -28 24  (8 mm) |
| Precuneus | | | L | 0.032* | | (Korponay et al., 2019; Kurth et al., 2014) | ±11 -60 27  (8 mm) |
| Heschl gyrus | | | R | 0.059* | | (Korponay et al., 2019) | ±36 -27 10  (8 mm) |
| Superior temporal gyrus | | | L | 0.069 | | (Hölzel et al., 2011; Korponay et al., 2019) | ±51 -48 19  (8 mm) |
| R | 0.048* | |
| Lingual gyrus | | | L | 0.068 | | (Pickut et al., 2013) (Korponay et al., 2019) | ±24 -74 2  (8 mm) |
| Inferior occipital gyrus | | | L | 0.049* | | (Bærentsen et al., 2010; Froeliger et al., 2012; Pickut et al., 2013) | ±21 -64 2  (8 mm) |
| R | 0.049* | |
| Posterior cerebellum | | | R | 0.097 | | (Froeliger et al., 2012; Hölzel et al., 2011; Vestergaard-Poulsen et al., 2009). | ±42 -60 -44  (16 mm) |

**p* < 0.05 Significant in in RM, ** *P* <0.05 Significant in NM, #x, y, z coordinates in MNI space.

RM= Rajyoga meditation, NM = Non-meditators, R=Right, L=Left.
